# Supplementary material for: Covalently coupled hybrid of graphitic carbon nitride with reduced graphene oxide as a superior performance lithium-ion battery anode
Source: Royal Society of Chemistry journal article supplement (doi:10.1039/c4nr03145h), 2014-08-11
Supplement: c4nr03145h1.pdf [file c4nr03145h1.pdf]

## Supplementary Information

### Covalently coupled hybrid of graphitic carbon nitride with reduced graphene oxide as a superior performance lithium-ion battery anode

Yongsheng Fu, Junwu Zhu, Chong Hu, Xiaodong Wu and Xin Wang

**Table 1S.** N species content (at.%) of the g-C<sub>3</sub>N<sub>4</sub>-rGO-1 obtained based on XPS analysis.

| Sample                                 | C-N=C | N-(C) <sub>3</sub> | -NH <sub>2</sub> | C-N-H |
|----------------------------------------|-------|--------------------|------------------|-------|
| g-C <sub>3</sub> N <sub>4</sub> -rGO-1 | 49.8  | 23.6               | 15.1             | 11.5  |

**Table 2S.** The first cycle discharge capacity, charge capacity and coulombic efficiency for the g-C<sub>3</sub>N<sub>4</sub>, rGO, and g-C<sub>3</sub>N<sub>4</sub>-rGO-n (n=0.25, 0.5, 1, 2, 3) electrodes.

| Samples                                   | discharge capacity<br>(mAh g <sup>-1</sup> ) | charge capacity<br>(mAh g <sup>-1</sup> ) | coulombic efficiency<br>(%) |
|-------------------------------------------|----------------------------------------------|-------------------------------------------|-----------------------------|
| rGO                                       | 1200                                         | 426                                       | 33                          |
| g-C <sub>3</sub> N <sub>4</sub> -rGO-0.25 | 2080                                         | 1015                                      | 48                          |
| g-C <sub>3</sub> N <sub>4</sub> -rGO-0.5  | 2289                                         | 1116                                      | 49                          |
| g-C <sub>3</sub> N <sub>4</sub> -rGO-1    | 3002                                         | 1705                                      | 57                          |
| g-C <sub>3</sub> N <sub>4</sub> -rGO-2    | 2695                                         | 1008                                      | 37                          |
| g-C <sub>3</sub> N <sub>4</sub> -rGO-3    | 1071                                         | 388                                       | 36                          |
| g-C <sub>3</sub> N <sub>4</sub>           | 151                                          | 67                                        | 44                          |

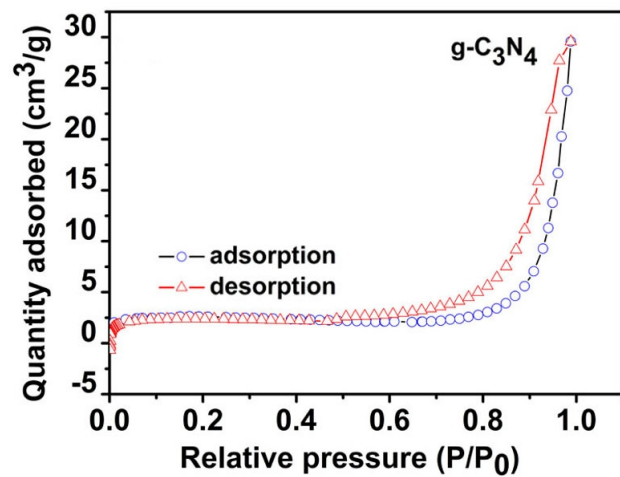

Figure 1S. Nitrogen adsorption/desorption isotherm of  $g\text{-C}_3\text{N}_4$ .

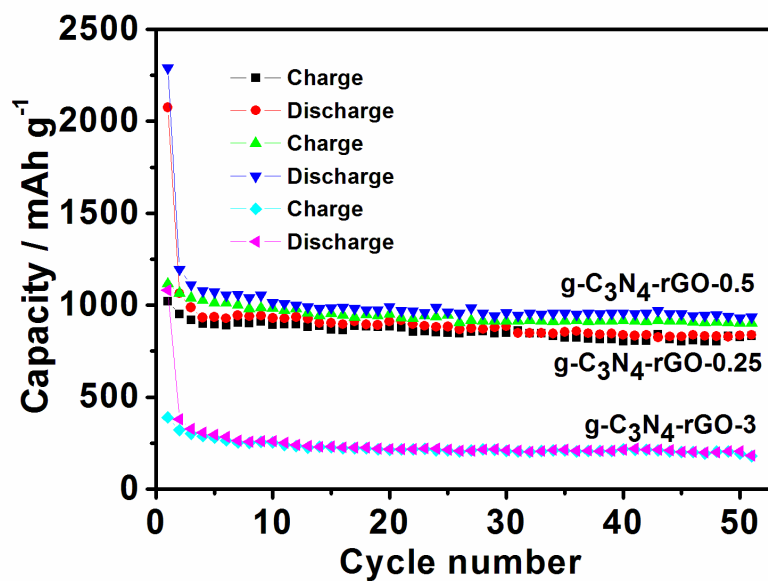

Figure 2S. Cycle performance the  $g\text{-C}_3\text{N}_4\text{-rGO-n}$  ( $n=0.25, 0.5, 3$ ) electrodes at a current rate of  $100 \text{ mA g}^{-1}$  between 3.0 and 0.01 V *versus*  $\text{Li}^+/\text{Li}$
